# Supplementary material for: Transcriptome profiling of anti-müllerian hormone treated preantral/small antral mouse ovary follicles
Source: PubMed Central journal article supplement (PMC6084392; doi:10.18632/oncotarget.25572), 2018-07-13
Supplement: oncotarget-09-30253-s001.pdf [file oncotarget-09-30253-s001.pdf]

## Transcriptome profiling of anti-müllerian hormone treated preantral/small antral mouse ovary follicles

### SUPPLEMENTARY MATERIALS

**Supplementary Table 1:** Data set GSE56737 at concentrations 50 and 200 ng at 12 and 24 hours interval. See Supplementary\_Table\_1

**Supplementary Table 2:** List of differences at 12 and 24 hours' time intervals at 50 and 200 ng concentrations intervals. See Supplementary\_Table\_2

**Supplementary Table 3:** List of Gene set 1 and Gene set 2 logFCa&b, logFCc&d, logFCa&c, logFCb&d. See Supplementary\_Table\_3

**Supplementary Table 4:** List of Gene set 1 and Gene set 2 cor 1-0.8 values. See Supplementary\_Table\_4

**Supplementary Table 5:** List of Gene set 1 and Gene set 2-Transcription Factors (TF) network. See Supplementary\_Table\_5
